# Supplementary material for: Coinfection of Cotton Plants with Watermelon Mosaic Virus and a Novel Polerovirus in China
Source: MDPI journal article supplement (doi:10.3390/v13112210), 2021-11-03
Supplement: s1 [file s1]

# Coinfection of Cotton Plants with Watermelon Mosaic virus and a Novel Polerovirus in China

**Table S1.** Sequences of primers used for amplification of cotton leaf roll virus (CLRV) and watermelon mosaic virus (WMV).

| Primer Name  | Primer Sequences (5'–3')                     |
|--------------|----------------------------------------------|
| CLRV-1F      | ATGTTGAATTGATTATCTGC                         |
| CLRV-1R      | TAGCAACTACATCTTCGGCGGT                       |
| CYV-2F       | GCGAATCAGATGAGTACCACCG                       |
| CLRV-2R      | CTCCATCTTCATCATCACATGT                       |
| CLRV-3F      | CACATTGGCGGCGACTGCGATG                       |
| CLRV-3R      | CACCGAAACCCAGGGAGAGT                         |
| 5'RACE CLRV  | GATTACGCCAAGCTTCGCGGGTCTGTCTACCAGTGGCCGCTCG  |
| 3'RACE CLRV  | GATTACGCCAAGCTTGGCTTGGAGGCCAGGGACAGGTCCTGG   |
| WMV-1F       | AATGGCAACAATTATGTTTGA                        |
| WMV-1R       | ATAAGGAGTATGTACGGATCTTC                      |
| WMV-2F       | TGACAGTTGGGTATCATGT                          |
| WMV-2R       | GTCGTTTCATGAACTTCTTTCC                       |
| WMV-3F       | TGACTGTACCAAAGTTGATATC                       |
| WMV-3R       | TGGCATCCAGAACCCATCTCTC                       |
| WMV-4F       | CAGAGTAGAAAGGAGAGATGGG                       |
| WMV-4R2      | GCAACAAACATTACCGTACCTC                       |
| 5' RACE WMV  | GATTACGCCAAGCTTGGCGCTCAGGCCCGCGCACCTTTCTGTG  |
| 3' RACE WMV  | GATTACGCCAAGCTTGGCCGCAGCTCTCGCGGGAATTAACAGC  |
| WMV-NS-RT    | ggcagtatcgtgaattcgatgcCAGAGTAGAAAGGAGAGATGGG |
| WMV-NS-tag   | GGCAGTATCGTGAATTCGATGC                       |
| WMV-NS-R     | AACTGTCGAACTGTGAACCATC                       |
| qRT-CLRV-F   | GTACAAGTGGGAAGACGAGAAA                       |
| qRT-CLRV-R   | AAGCTGGGATCACGAAGTATG                        |
| qRT-WMV-F    | GCTAAGACAGCTACGCAACTAC                       |
| qRT-WMV-R    | CGGCATCACTCCTCTCATTATC                       |
| qRT-GbUBQ7-F | GACCTACACCAAGCCCAAGAAG                       |
| qRT-GbUBQ7-R | TGAGCCACACTTACCACAATAGT                      |
